# Supplementary material for: High magnetization reversal barriers in luminescent dysprosium octahedral and pentagonal bipyramidal single-molecule magnets based on fluorinated alkoxide ligands
Source: Royal Society of Chemistry journal article supplement (doi:10.1039/d1dt01319j), 2021-01-01
Supplement: d1dt01319j1.pdf [file d1dt01319j1.pdf]

## SUPPORTING INFORMATION

### **High Magnetization Reversal Barriers in Luminescent Dysprosium Octahedral and Pentagonal Bipyramidal Single-Molecule Magnets based on fluorinated alkoxides ligands**

**Jérôme Long<sup>\*,a</sup>, Aleksei O. Tolpygin,<sup>b,c</sup> Dmitry M. Lyubov,<sup>b,c</sup> Natalia Yu. Rad'kova,<sup>b</sup> Anton V. Cherkasov,<sup>b</sup> Yulia V. Nelyubina,<sup>c</sup> Yannick Guari,<sup>a</sup> Joulia Larionova<sup>a</sup> and Alexander A. Trifonov<sup>\*b,c</sup>**

*<sup>a</sup> ICGM, Univ. Montpellier, CNRS, ENSCM, Montpellier, France. E-mail: jerome.long@umontpellier.fr*

*<sup>b</sup> Institute of Organometallic Chemistry of Russian Academy of Sciences, 49 Tropinina str., GSP-445, 630950, Nizhny Novgorod, Russia. E-mail: trif@iomc.ras.ru*

*<sup>c</sup> A.N.Nesmeyanov Institute of Organoelement Compounds of Russian Academy of Sciences, 28 Vavilova str., 119334, Moscow, Russia.*

## TABLE OF CONTENTS

|                                                                                                                                                                                                                                                                                                                                                                                             |    |
|---------------------------------------------------------------------------------------------------------------------------------------------------------------------------------------------------------------------------------------------------------------------------------------------------------------------------------------------------------------------------------------------|----|
| Figure S1: Perspective view of the crystal packing for 1, 2 and 3 along the $b$ and $a$ crystallographic axes. Hydrogen atoms have been omitted for clarity. ....                                                                                                                                                                                                                           | 3  |
| Figure S2: Temperature dependence of $\chi T$ under an applied magnetic field of 1000 Oe (1 and 2) or 10000 Oe field (3). The measurement under a 1000 Oe field for 3 gives a higher $\chi T$ value to a temperature independent paramagnetic contribution, which should be diminished under larger field. <sup>1</sup> Inset: field dependence of the magnetization at 1.8 K for 1-3. .... | 4  |
| Figure S3: Hysteresis loops obtained at 1.8 K for 1–3 at an average sweep rate of 17 Oe·s <sup>-1</sup> . ....                                                                                                                                                                                                                                                                              | 4  |
| Figure S4: Hysteresis loops obtained at various temperature for 3 at an average sweep rate of 20 Oe·s <sup>-1</sup> . ....                                                                                                                                                                                                                                                                  | 5  |
| Figure S5: Frequency dependence of $\chi'$ and $\chi''$ for 1–3 for different temperatures performed in zero magnetic static field. ....                                                                                                                                                                                                                                                    | 6  |
| Figure S6: Cole-Cole (Argand) plots obtained using the ac susceptibility data for 1-3 in zero magnetic field. The solid lines correspond to the best fit obtained with a generalized Debye model. ....                                                                                                                                                                                      | 7  |
| Figure S7: Temperature dependence of $\chi'$ and $\chi''$ for 1-3 with different frequencies in zero applied magnetic field. ....                                                                                                                                                                                                                                                           | 8  |
| Figure S8: Frequency dependence of $\chi'$ and $\chi''$ for 1-3 for various dc fields. ....                                                                                                                                                                                                                                                                                                 | 9  |
| Figure S9: Field dependence of the relaxation time for 1 and 2 at 30 K. The solid lines represent the fit with Eq. 2. ....                                                                                                                                                                                                                                                                  | 10 |
| Figure S10: Frequency dependence of $\chi'$ and $\chi''$ for 1-3 under a 1000 Oe dc field. ....                                                                                                                                                                                                                                                                                             | 11 |
| Figure S11: Cole-Cole (Argand) plot obtained using the ac susceptibility data for 1-3 (1000 Oe). The solid lines correspond to the best fit obtained with a generalized Debye model. ....                                                                                                                                                                                                   | 12 |
| Figure S12: Temperature dependence of the relaxation time for 1-3 using the ac data at 1000 Oe. The solid line represents the fit The uncertainties were determined from the CC-FIT2 software <sup>2</sup> while the magenta solid lines correspond to the fit with Eq. 3 (1000 Oe). ....                                                                                                   | 13 |
| Figure S13: Temperature dependence of the relaxation time plotted as $\log \tau^{-1}$ vs. $\log T$ . The second derivative allows the determination of the $\tau_{\text{switch}}$ . ....                                                                                                                                                                                                    | 14 |
| Figure S14: Room temperature normalized excitation spectra monitored at $\lambda_{em.} = 584$ (1)/582(2)/593(3) nm and emission spectra with $\lambda_{exc.} = 390$ nm (1 and 2) and 393 nm (3). ....                                                                                                                                                                                       | 15 |
| Figure S15: Low temperature (77 K) normalized excitation spectra monitored at $\lambda_{em.} = 584$ (1) and 593 (3) nm and emission spectra at $\lambda_{exc.} = 390$ (1) and 393 (3) nm. ....                                                                                                                                                                                              | 16 |
| Figure S16: High-resolution excitation spectra monitored at $\lambda_{em.} = 582$ nm for 2 showing a Gaussian deconvolution in five different peaks. ....                                                                                                                                                                                                                                   | 17 |
|                                                                                                                                                                                                                                                                                                                                                                                             |    |
| Table S1: Crystal data, data collection and structure refinement details for 1-3. ....                                                                                                                                                                                                                                                                                                      | 18 |
| Table S2: SHAPE analysis for 2 and 3. ....                                                                                                                                                                                                                                                                                                                                                  | 19 |
| Table S3: Fitting of the Cole-Cole plots with a generalized Debye model under a zero dc field for 1. ....                                                                                                                                                                                                                                                                                   | 19 |
| Table S4: Fitting of the Cole-Cole plots with a generalized Debye model for temperature ranging under a zero dc field for 2. ....                                                                                                                                                                                                                                                           | 20 |
| Table S5: Fitting of the Cole-Cole plots with a generalized Debye model for temperature ranging under a zero dc field for 3. ....                                                                                                                                                                                                                                                           | 21 |
| Table S6: Fit parameters of the field dependence of the relaxation time at 30 K for 1 and 2. ....                                                                                                                                                                                                                                                                                           | 21 |
| Table S7. Fitting of the Cole-Cole plots with a generalized Debye model under a 1000 Oe dc field for 1. ....                                                                                                                                                                                                                                                                                | 22 |
| Table S8. Fitting of the Cole-Cole plots with a generalized Debye model under a 1000 Oe dc field for 2. ....                                                                                                                                                                                                                                                                                | 22 |
| Table S9. Fitting of the Cole-Cole plots with a generalized Debye model under a 1000 Oe dc field for 2. ....                                                                                                                                                                                                                                                                                | 23 |
| Table S10. Fit parameters of the temperature dependence of the relaxation time for 1-3. ....                                                                                                                                                                                                                                                                                                | 23 |
| Table S11. Estimation of the relaxation time and temperature switch. ....                                                                                                                                                                                                                                                                                                                   | 23 |

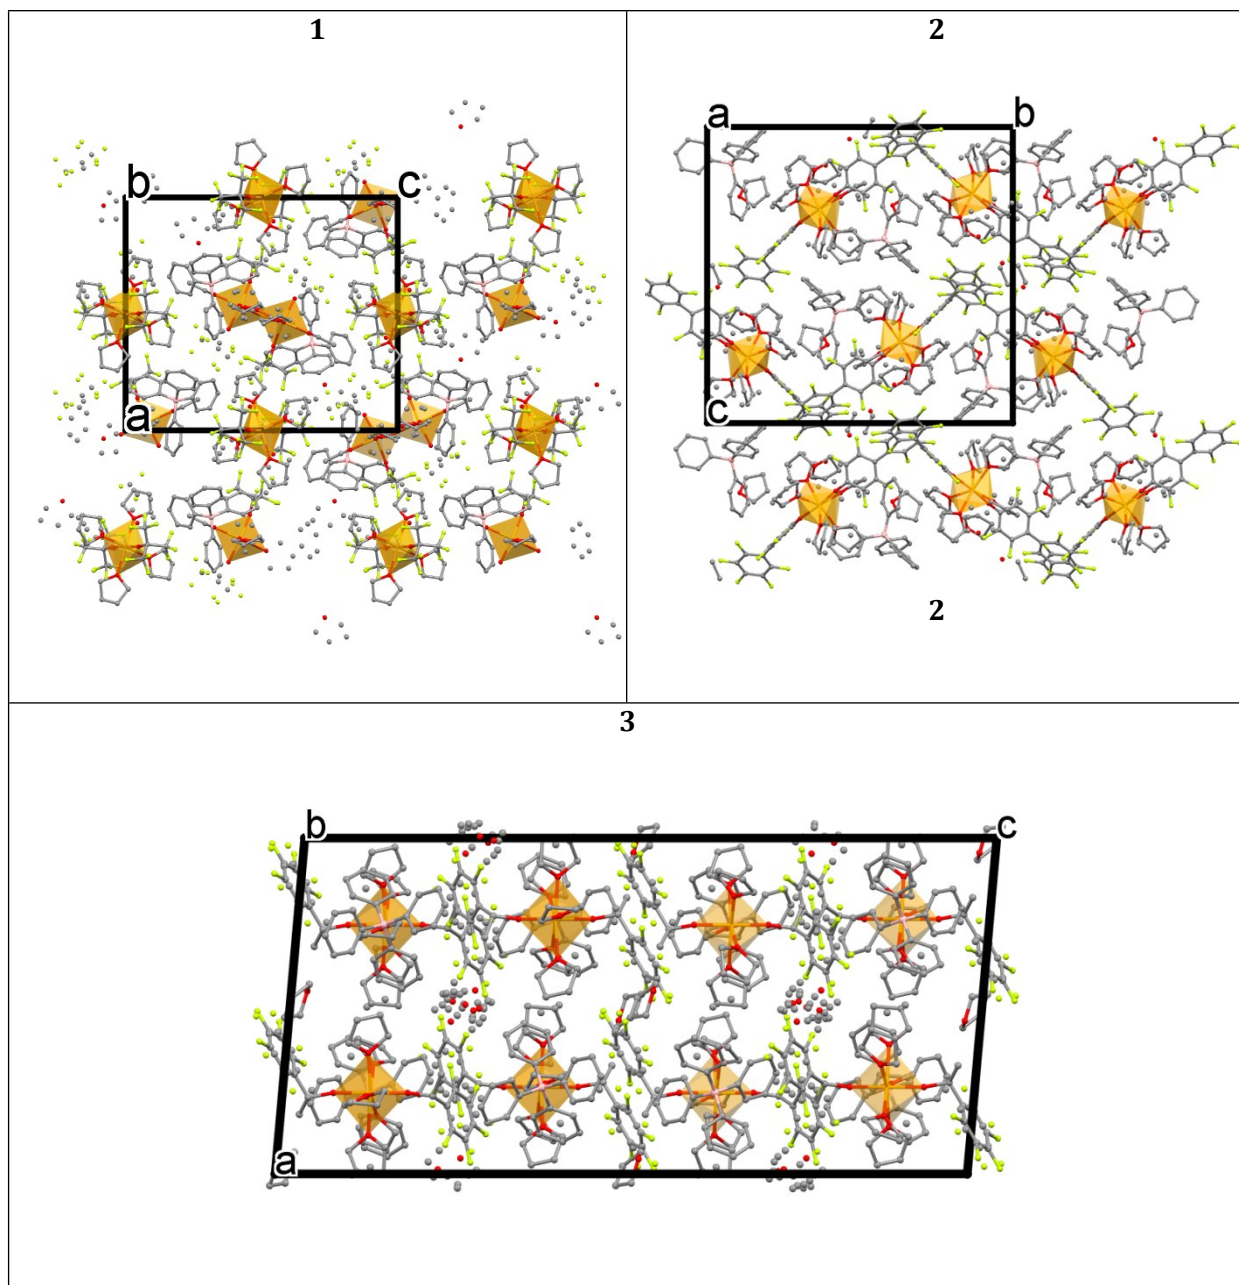

**Figure S1:** Perspective view of the crystal packing for **1**, **2** and **3** along the *b* and *a* crystallographic axes. Hydrogen atoms have been omitted for clarity.

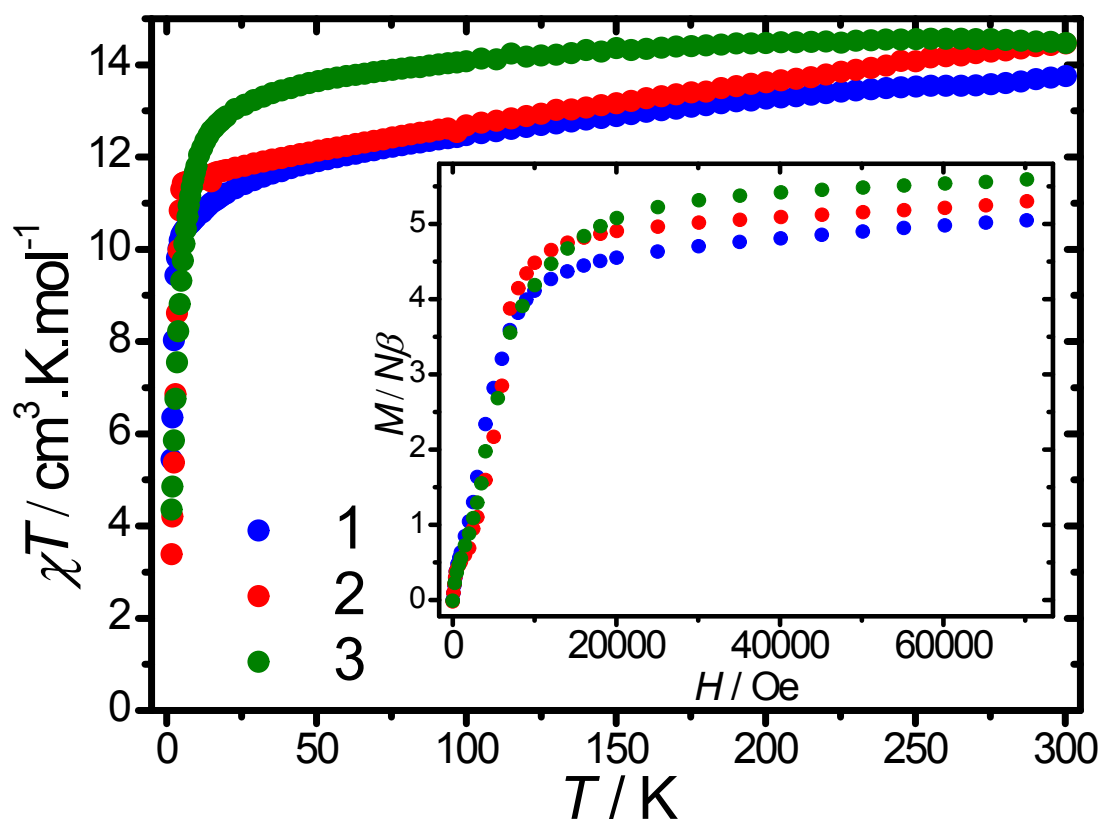

**Figure S2:** Temperature dependence of  $\chi T$  under an applied magnetic field of 1000 Oe (1 and 2) or 10000 Oe field (3). The measurement under a 1000 Oe field for 3 gives a higher  $\chi T$  value to a temperature independent paramagnetic contribution, which should be diminished under larger field.<sup>1</sup> Inset: field dependence of the magnetization at 1.8 K for 1-3.

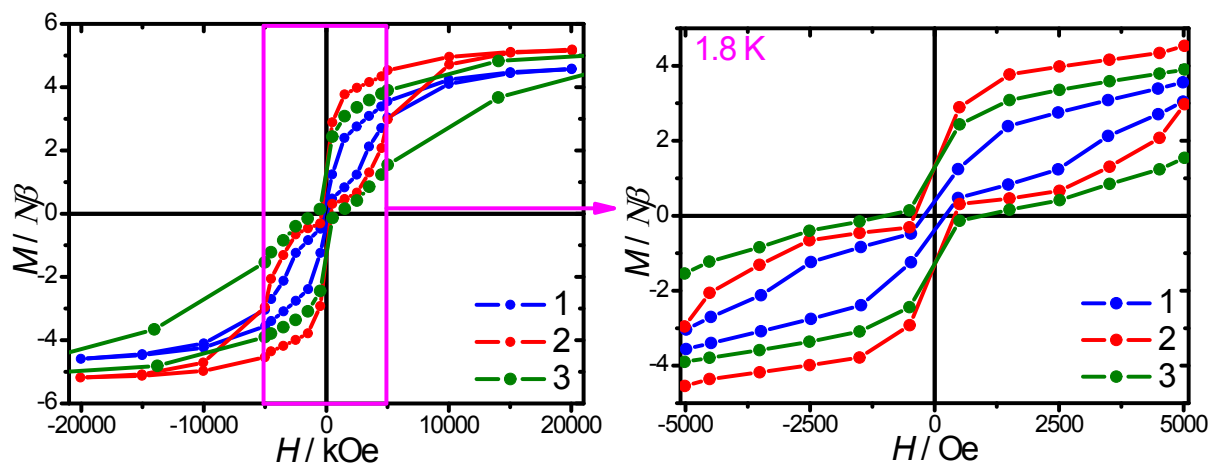

**Figure S3:** Hysteresis loops obtained at 1.8 K for 1-3 at an average sweep rate of  $17 \text{ Oe} \cdot \text{s}^{-1}$ .

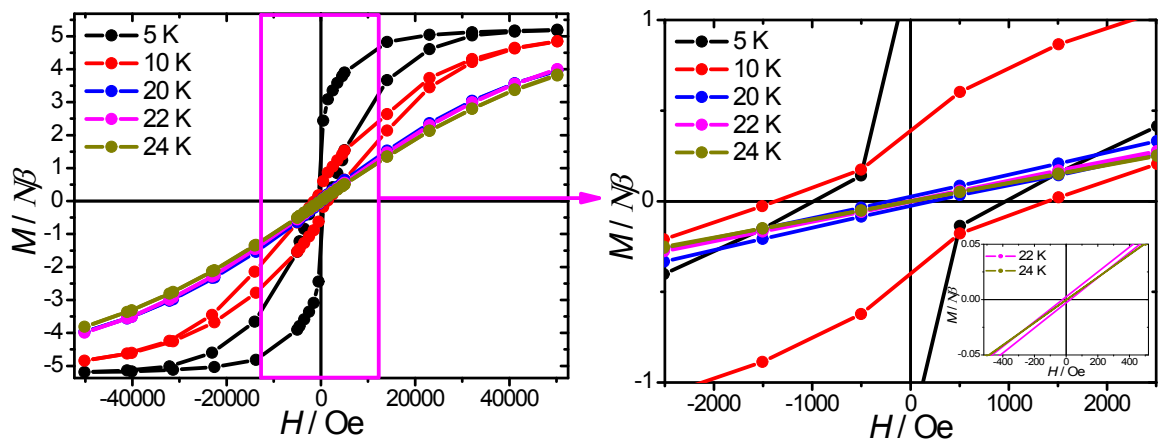

**Figure S4:** Hysteresis loops obtained at various temperature for **3** at an average sweep rate of  $20 \text{ Oe}\cdot\text{s}^{-1}$ .

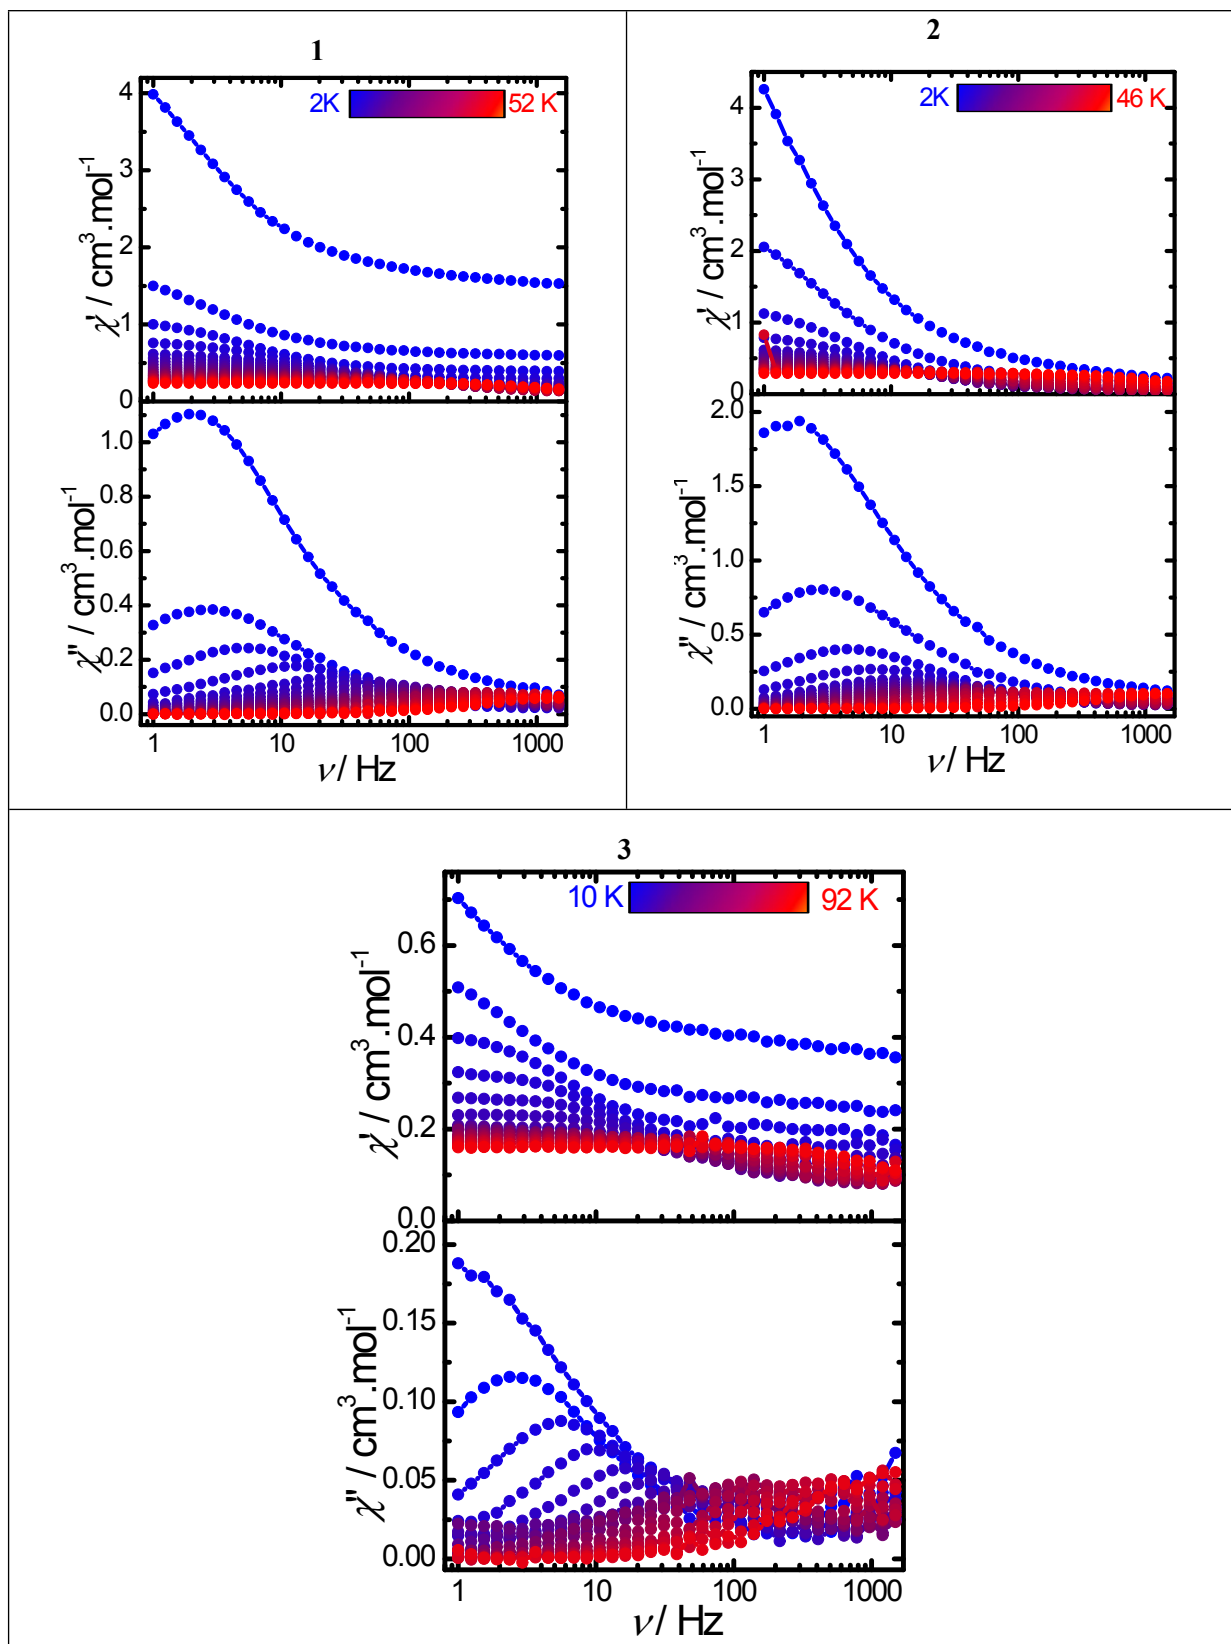

**Figure S5:** Frequency dependence of  $\chi'$  and  $\chi''$  for 1–3 for different temperatures performed in zero magnetic static field.

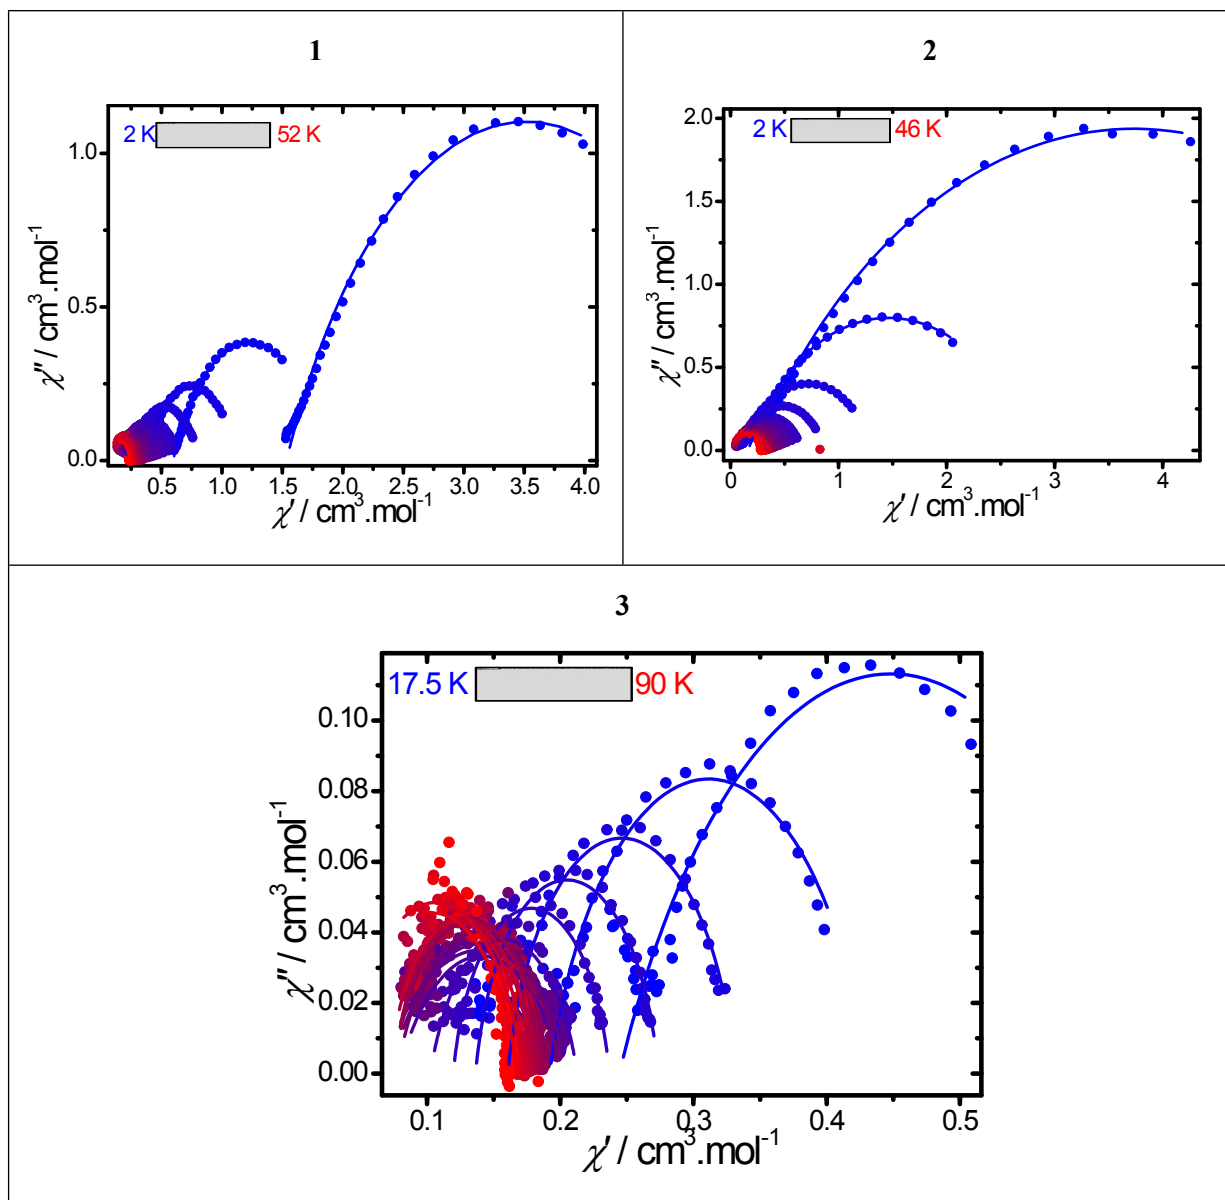

**Figure S6:** Cole-Cole (Argand) plots obtained using the ac susceptibility data for **1-3** in zero magnetic field. The solid lines correspond to the best fit obtained with a generalized Debye model.

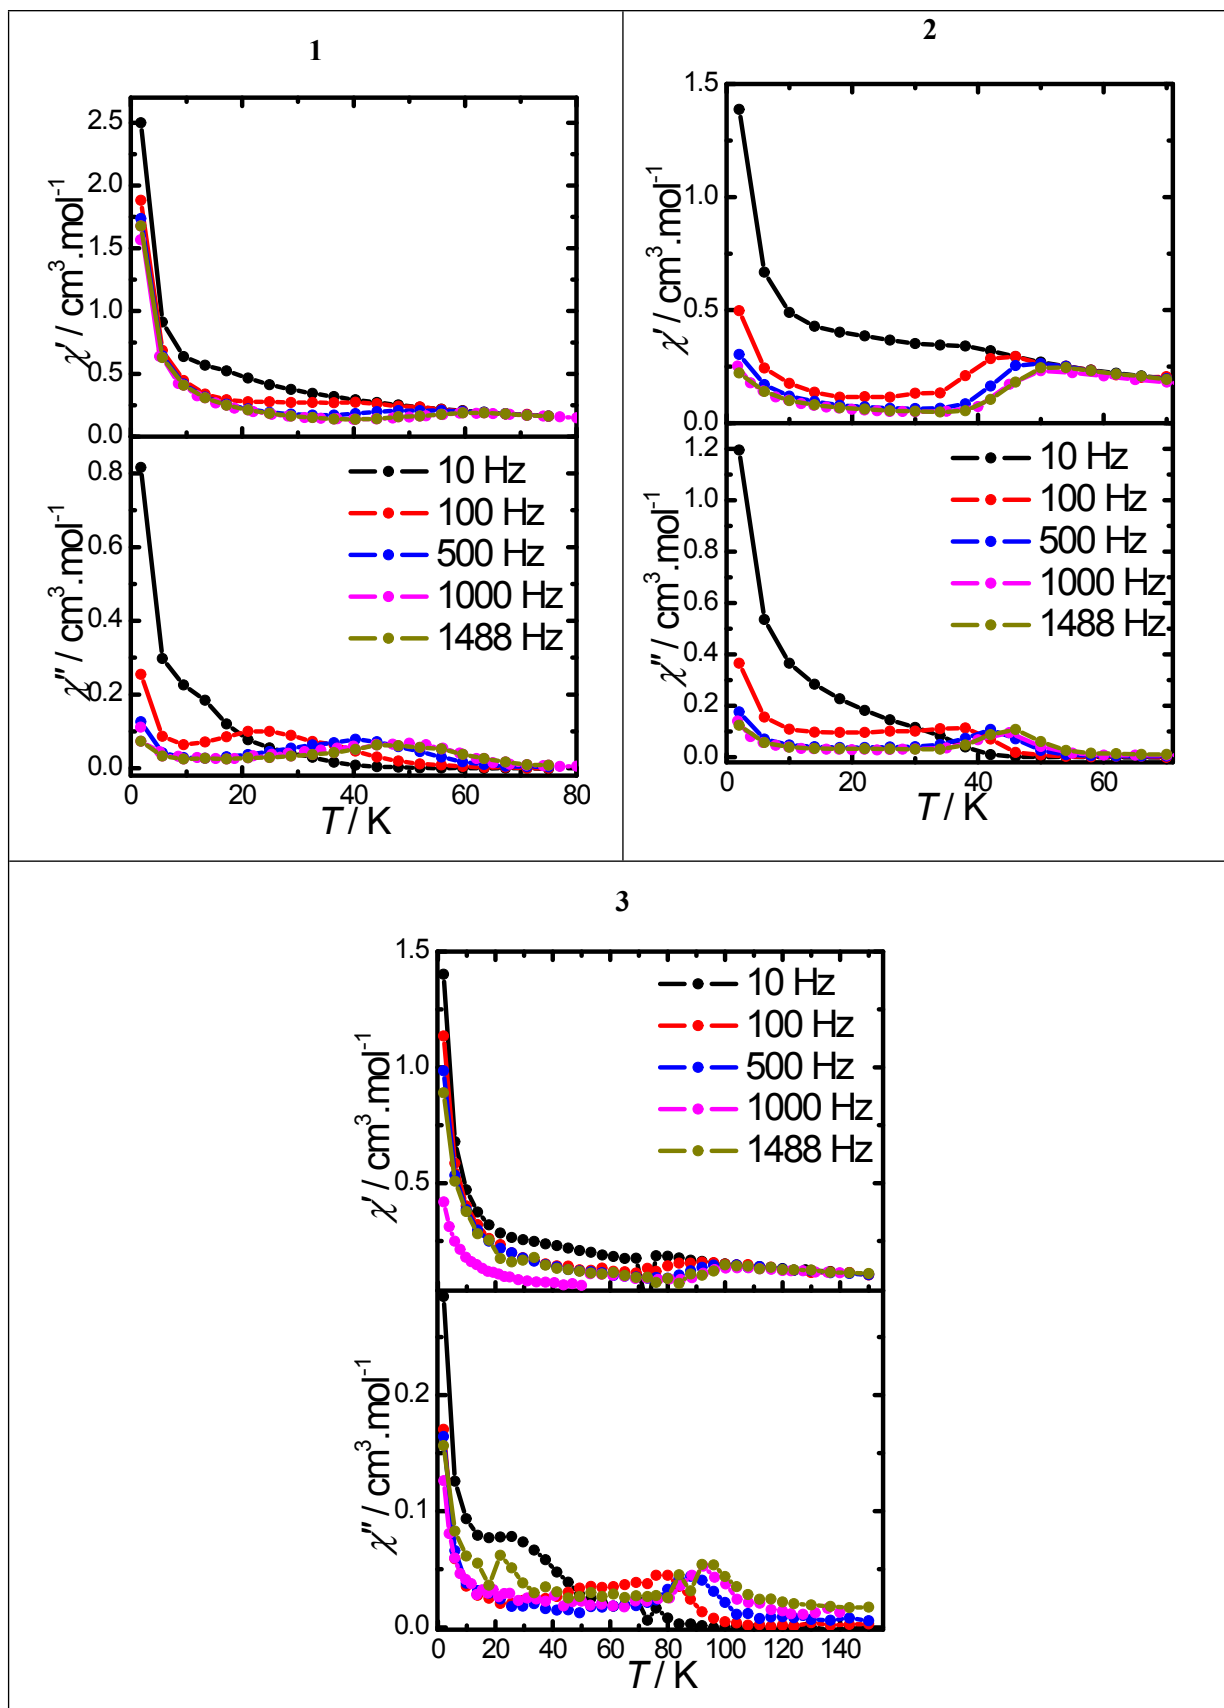

**Figure S7:** Temperature dependence of  $\chi'$  and  $\chi''$  for 1-3 with different frequencies in zero applied magnetic field.



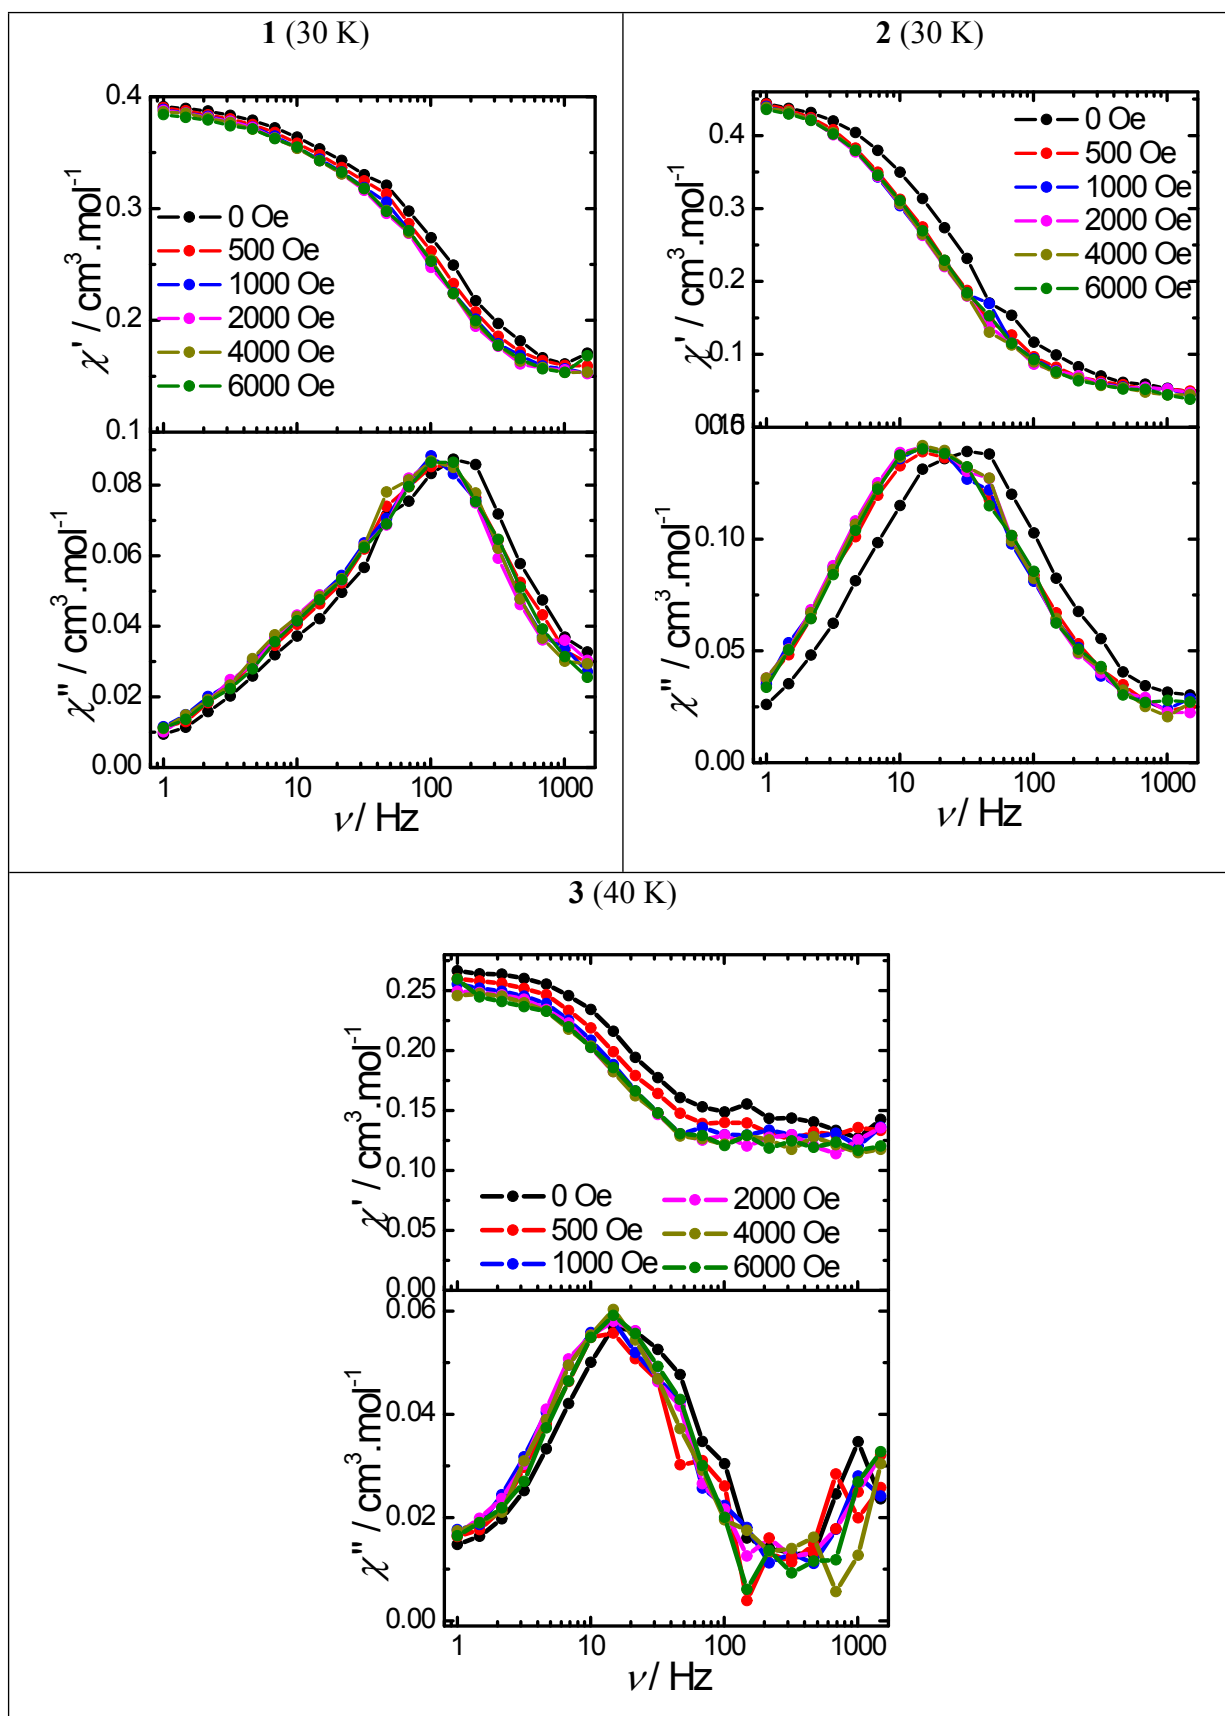

**Figure S8:** Frequency dependence of  $\chi'$  and  $\chi''$  for 1-3 for various dc fields.

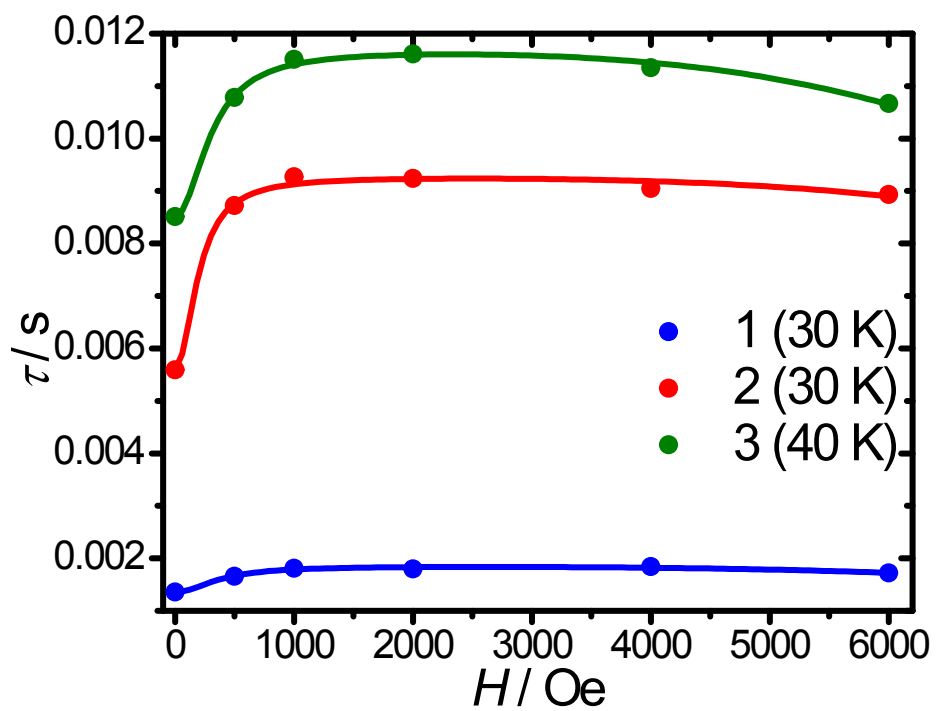

**Figure S9:** Field dependence of the relaxation time for **1** and **2** at 30 K. The solid lines represent the fit with Eq. 2.

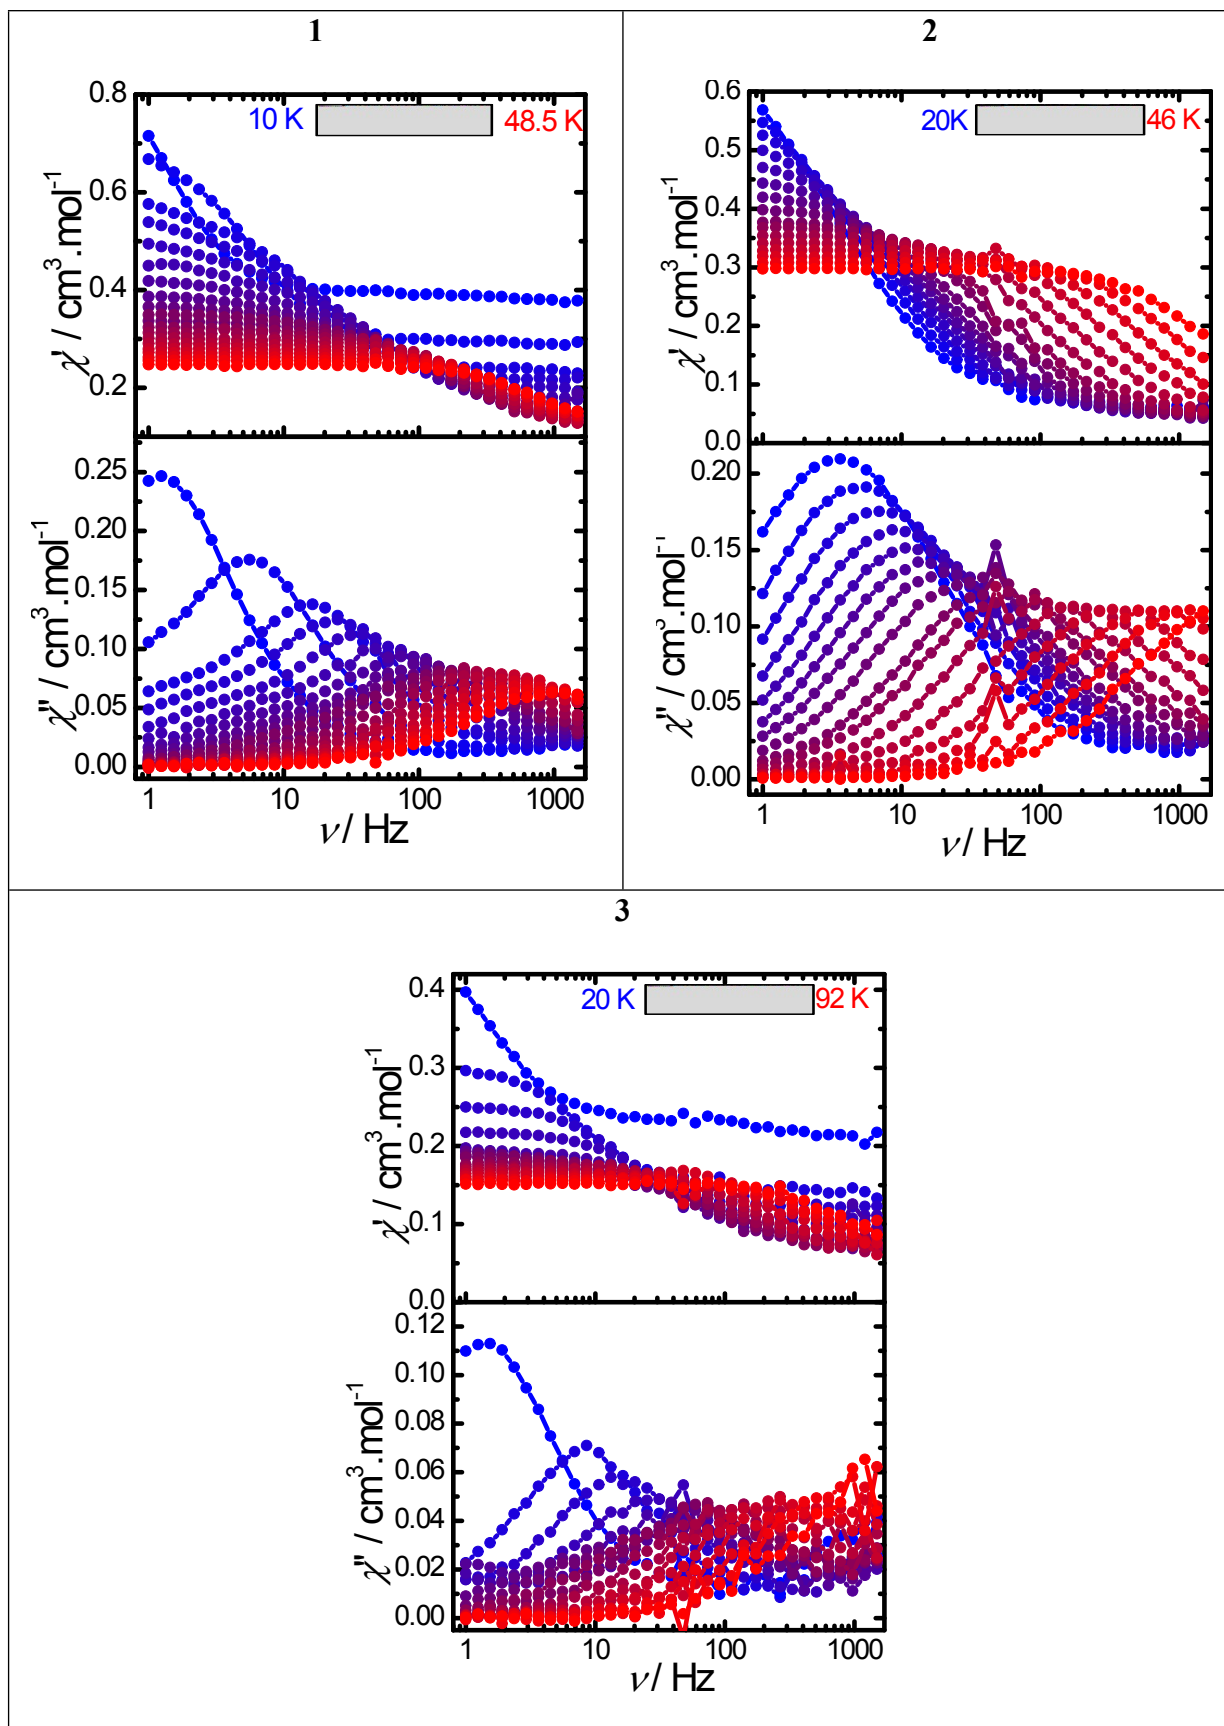

**Figure S10:** Frequency dependence of  $\chi'$  and  $\chi''$  for 1-3 under a 1000 Oe dc field.

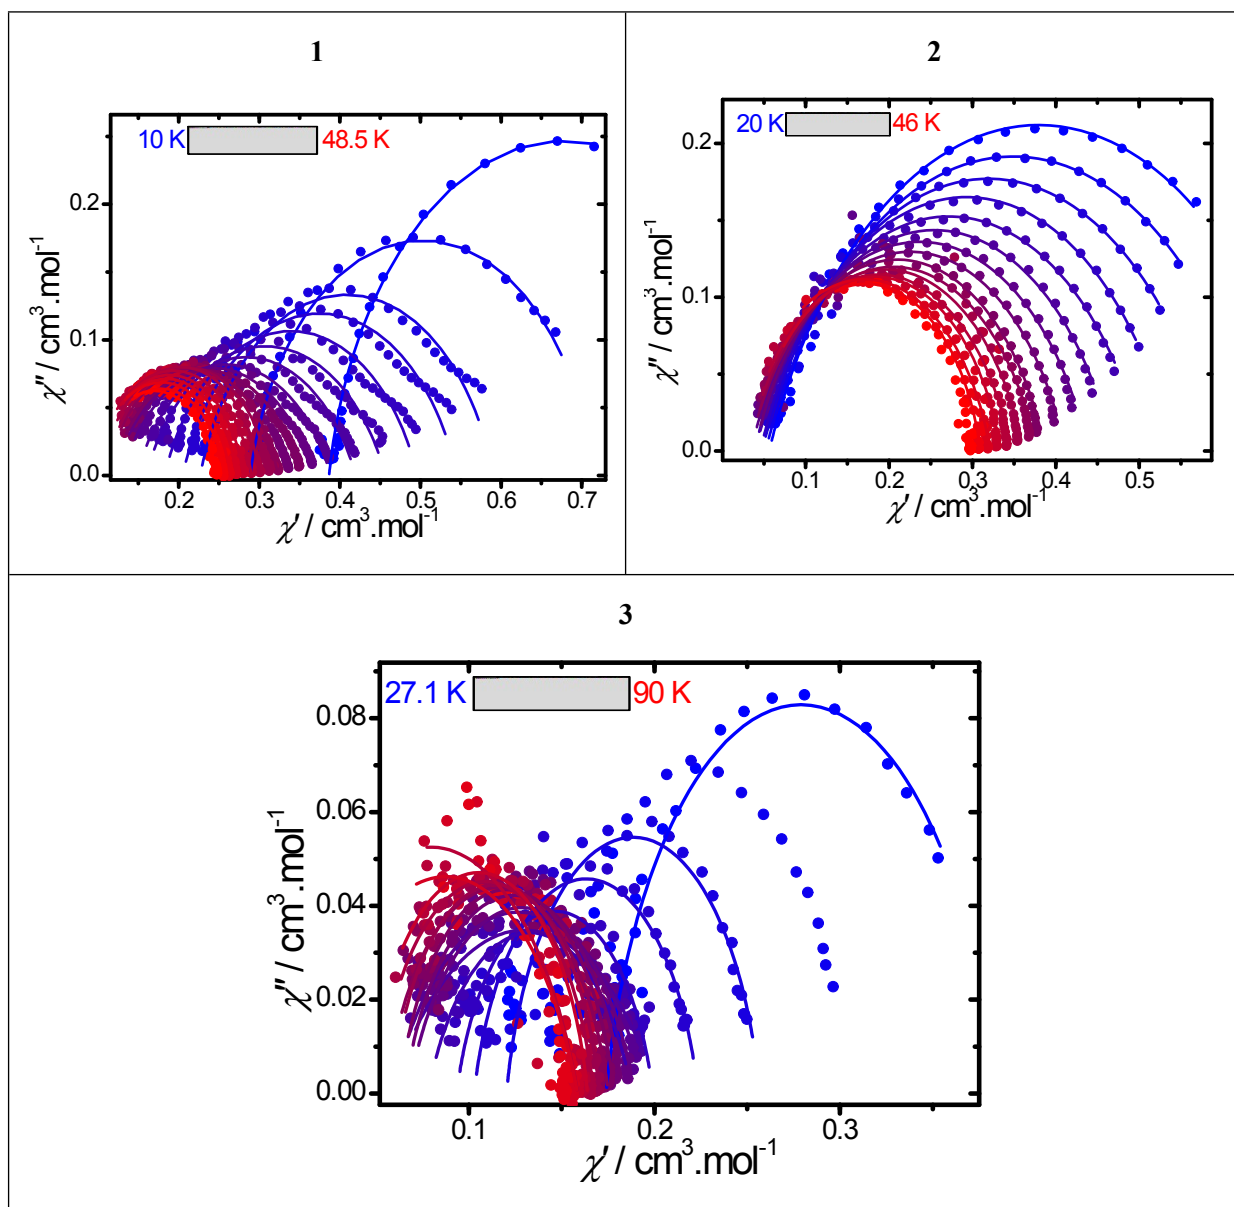

**Figure S11:** Cole-Cole (Argand) plot obtained using the ac susceptibility data for 1-3 (1000 Oe). The solid lines correspond to the best fit obtained with a generalized Debye model.

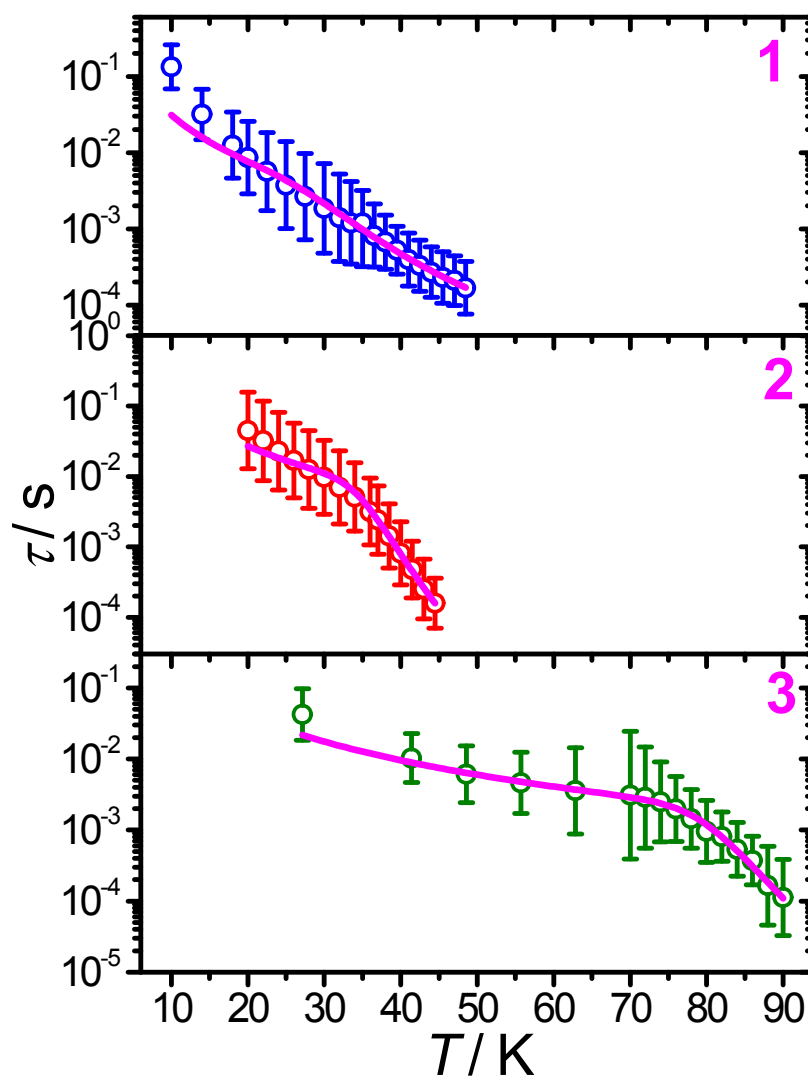

**Figure S12:** Temperature dependence of the relaxation time for 1-3 using the ac data at 1000 Oe. The solid line represents the fit. The uncertainties were determined from the CC-FIT2 software<sup>2</sup> while the magenta solid lines correspond to the fit with Eq. 3 (1000 Oe).

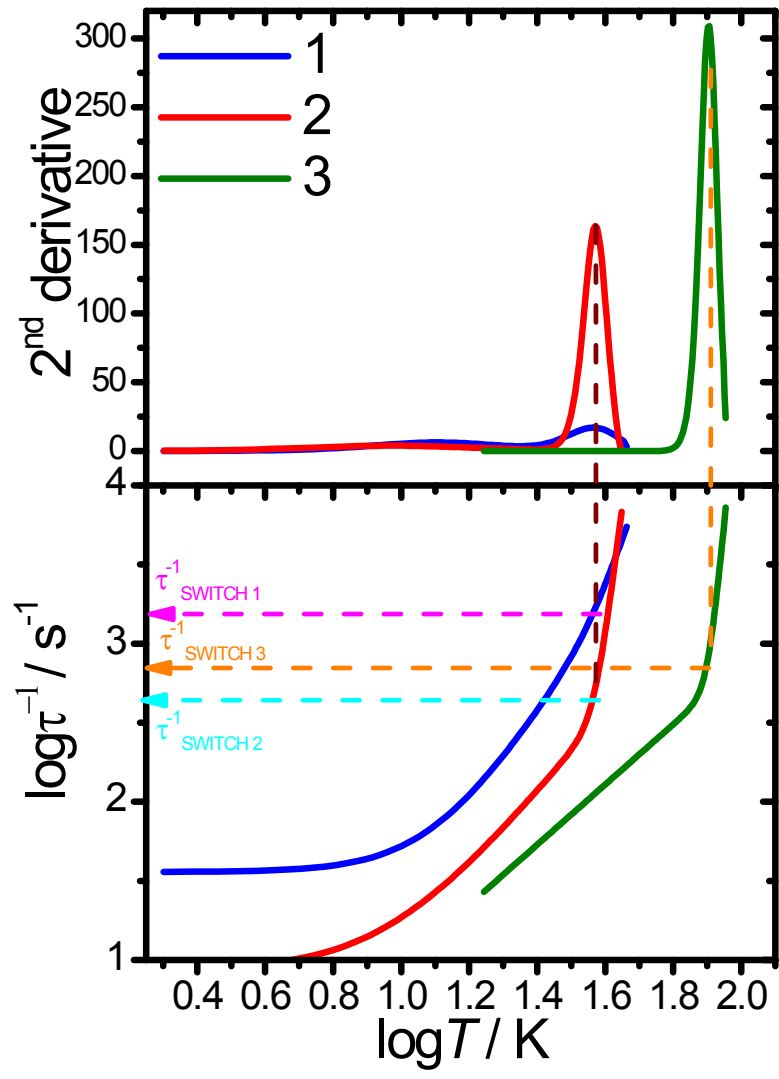

**Figure S13:** Temperature dependence of the relaxation time plotted as  $\log \tau^{-1}$  vs.  $\log T$ . The second derivative allows the determination of the  $\tau_{\text{switch}}$ .

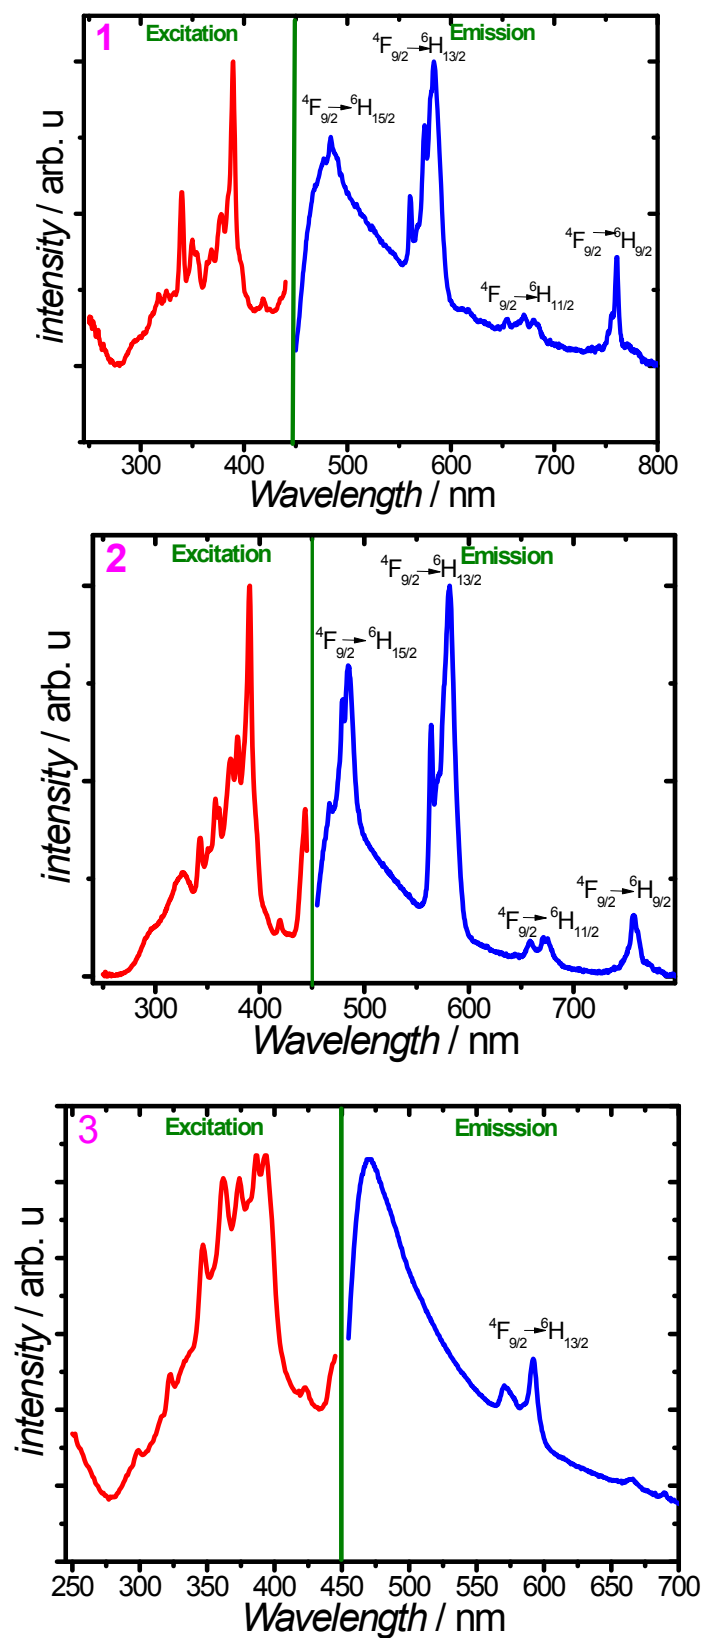

**Figure S14:** Room temperature normalized excitation spectra monitored at  $\lambda_{em.} = 584$  (1)/582(2)/593(3) nm and emission spectra with  $\lambda_{exc.} = 390$  nm (1 and 2) and 393 nm (3).

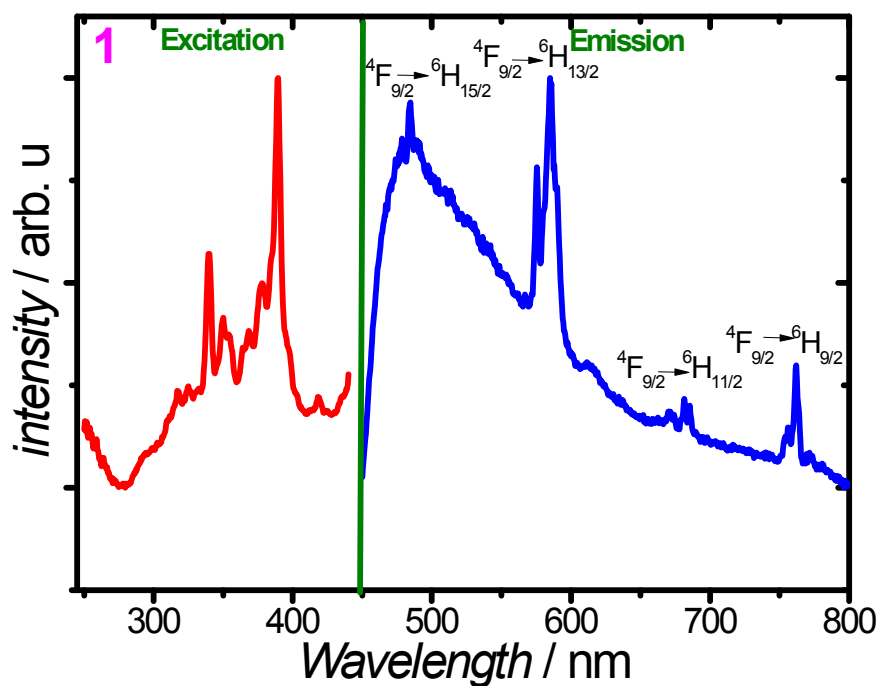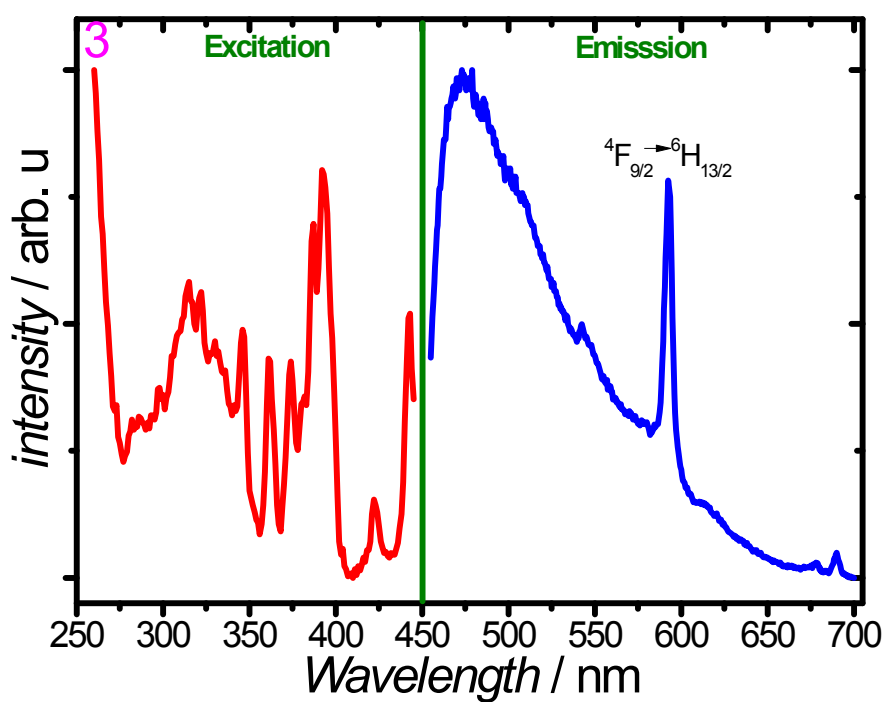

**Figure S15:** Low temperature (77 K) normalized excitation spectra monitored at  $\lambda_{em.} = 584$  (1) and 593 (3) nm and emission spectra at  $\lambda_{exc.} = 390$  (1) and 393 (3) nm.



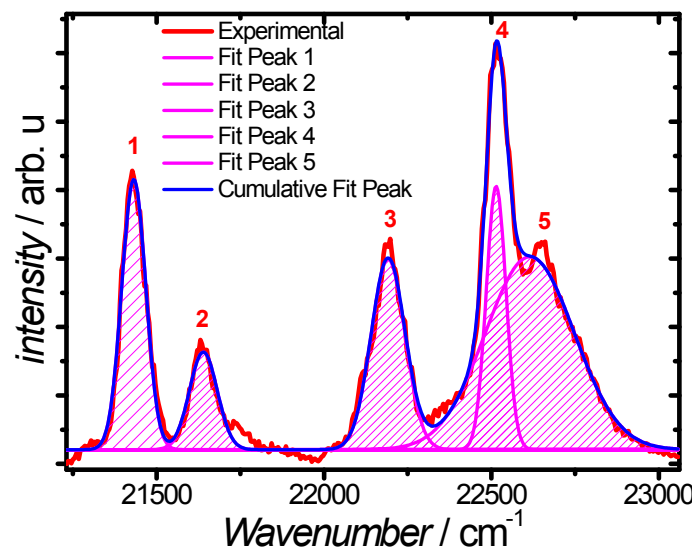

**Figure S16:** High-resolution excitation spectra monitored at  $\lambda_{em.} = 582$  nm for **2** showing a Gaussian deconvolution in five different peaks.

**Table S1:** Crystal data, data collection and structure refinement details for **1-3**.

|                                                                                           | <b>1</b>                                                                                                                                  | <b>2</b>                                                                                                                                   | <b>3</b>                                                                                                                                  |
|-------------------------------------------------------------------------------------------|-------------------------------------------------------------------------------------------------------------------------------------------|--------------------------------------------------------------------------------------------------------------------------------------------|-------------------------------------------------------------------------------------------------------------------------------------------|
| Formula                                                                                   | C <sub>24</sub> H <sub>32</sub> DyF <sub>18</sub> O <sub>6</sub> ,<br>C <sub>24</sub> H <sub>20</sub> B, ½C <sub>4</sub> H <sub>8</sub> O | C <sub>44</sub> H <sub>40</sub> DyF <sub>18</sub> O <sub>7</sub> ,<br>C <sub>24</sub> H <sub>19</sub> B, 2½C <sub>4</sub> H <sub>8</sub> O | C <sub>36</sub> H <sub>48</sub> DyF <sub>10</sub> O <sub>7</sub> ,<br>C <sub>24</sub> H <sub>20</sub> B, 2C <sub>4</sub> H <sub>8</sub> O |
| <i>M</i>                                                                                  | 1276.25                                                                                                                                   | 1683.72                                                                                                                                    | 1408.66                                                                                                                                   |
| <i>T</i> , K                                                                              | 100                                                                                                                                       | 120                                                                                                                                        | 110                                                                                                                                       |
| Crystal system                                                                            | Orthorhombic                                                                                                                              | Monoclinic                                                                                                                                 | Monoclinic                                                                                                                                |
| Space group                                                                               | <i>Pnma</i>                                                                                                                               | <i>P2<sub>1</sub>/c</i>                                                                                                                    | <i>C2/c</i>                                                                                                                               |
| <i>Z</i> ( <i>Z'</i> )                                                                    | 8 (1)                                                                                                                                     | 4 (1)                                                                                                                                      | 8 (1)                                                                                                                                     |
| <i>a</i> , Å                                                                              | 19.0304(2)                                                                                                                                | 12.9539(13)                                                                                                                                | 18.8988(3)                                                                                                                                |
| <i>b</i> , Å                                                                              | 24.9486(3)                                                                                                                                | 24.207(2)                                                                                                                                  | 17.6320(3)                                                                                                                                |
| <i>c</i> , Å                                                                              | 22.2887(2)                                                                                                                                | 23.410(2)                                                                                                                                  | 38.9502(6)                                                                                                                                |
| $\alpha$ , °                                                                              | 90                                                                                                                                        | 90                                                                                                                                         | 90                                                                                                                                        |
| $\beta$ , °                                                                               | 90                                                                                                                                        | 92.820(2)                                                                                                                                  | 95.056(2)                                                                                                                                 |
| $\gamma$ , °                                                                              | 90                                                                                                                                        | 90                                                                                                                                         | 120                                                                                                                                       |
| <i>V</i> , Å <sup>3</sup>                                                                 | 10582.27(19)                                                                                                                              | 7331.8(12)                                                                                                                                 | 129128.6(4)                                                                                                                               |
| <i>d</i> <sub>calcd</sub> , g·cm <sup>-3</sup>                                            | 1.602                                                                                                                                     | 1.525                                                                                                                                      | 1.447                                                                                                                                     |
| $\mu$ , mm <sup>-1</sup>                                                                  | 1.524                                                                                                                                     | 1.123                                                                                                                                      | 1.241                                                                                                                                     |
| <i>F</i> <sub>000</sub>                                                                   | 5128                                                                                                                                      | 3424                                                                                                                                       | 5800                                                                                                                                      |
| 2 $\theta$ <sub>max</sub> , °                                                             | 52.04                                                                                                                                     | 52.00                                                                                                                                      | 52.04                                                                                                                                     |
| Number of measured refl.                                                                  | 128769                                                                                                                                    | 47737                                                                                                                                      | 27770                                                                                                                                     |
| Number of independent refl. ( <i>R</i> <sub>int</sub> )                                   | 10688 (0.0685)                                                                                                                            | 14392 (0.1365)                                                                                                                             | 12690 (0.0283)                                                                                                                            |
| Observed refl. [ <i>I</i> > 2 $\sigma$ ( <i>I</i> )]                                      | 7455                                                                                                                                      | 7855                                                                                                                                       | 10557                                                                                                                                     |
| Parameters                                                                                | 1104                                                                                                                                      | 1049                                                                                                                                       | 1019                                                                                                                                      |
| <i>R</i> <sub>1</sub> [ <i>I</i> > 2 $\sigma$ ( <i>I</i> )]                               | 0.0438                                                                                                                                    | 0.0611                                                                                                                                     | 0.0466                                                                                                                                    |
| <i>wR</i> <sub>2</sub> (all data)                                                         | 0.1036                                                                                                                                    | 0.1574                                                                                                                                     | 0.1140                                                                                                                                    |
| <i>S</i> ( <i>F</i> <sup>2</sup> )                                                        | 1.005                                                                                                                                     | 1.015                                                                                                                                      | 1.062                                                                                                                                     |
| Residual density ( <i>d</i> <sub>min</sub> / <i>d</i> <sub>max</sub> ), e·Å <sup>-3</sup> | 1.21 / -1.54                                                                                                                              | 1.42 / -1.38                                                                                                                               | 1.21 / -0.79                                                                                                                              |

**Table S2:** SHAPE analysis for **2** and **3**.

|          | HP     | HPY    | PBPY  | COC   | CTPR  | JPBPY | JETPY  |
|----------|--------|--------|-------|-------|-------|-------|--------|
| <b>2</b> | 33.974 | 22.163 | 2.780 | 2.538 | 1.620 | 4.808 | 20.523 |
| <b>3</b> | 34.109 | 24.365 | 0.461 | 8.226 | 6.344 | 1.699 | 23.769 |

HP: Heptagon  
 HPY: Hexagonal pyramid  
 PBPY: Pentagonal bipyramid  
 COC: Capped octahedron  
 CTPR: Capped trigonal prism  
 JPBPY: Johnson pentagonal bipyramid J13  
 JETPY: Johnson elongated triangular pyramid J7

**Table S3:** Fitting of the Cole-Cole plots with a generalized Debye model under a zero dc field for **1**.

| $T$ (K) | $\chi_s$ (cm <sup>3</sup> · mol <sup>-1</sup> ) | $\chi_T$ (cm <sup>3</sup> · mol <sup>-1</sup> ) | $\alpha$ |
|---------|-------------------------------------------------|-------------------------------------------------|----------|
| 2       | 1.53402                                         | 5.49115                                         | 0.35185  |
| 6       | 0.59725                                         | 1.87565                                         | 0.31181  |
| 10      | 0.39032                                         | 1.11268                                         | 0.24857  |
| 14      | 0.28948                                         | 0.79268                                         | 0.22817  |
| 18      | 0.22859                                         | 0.62486                                         | 0.24336  |
| 20      | 0.20476                                         | 0.5657                                          | 0.25617  |
| 22      | 0.18468                                         | 0.51834                                         | 0.26587  |
| 24      | 0.16735                                         | 0.47826                                         | 0.27212  |
| 26      | 0.15306                                         | 0.44595                                         | 0.28661  |
| 28      | 0.13756                                         | 0.41755                                         | 0.29545  |
| 30      | 0.12607                                         | 0.39168                                         | 0.29996  |
| 32      | 0.11694                                         | 0.37122                                         | 0.30499  |
| 33.6    | 0.11865                                         | 0.35383                                         | 0.26819  |
| 35.2    | 0.11198                                         | 0.33788                                         | 0.25049  |
| 36.8    | 0.10975                                         | 0.32294                                         | 0.19697  |
| 38.4    | 0.10728                                         | 0.31029                                         | 0.15633  |
| 40      | 0.10061                                         | 0.2984                                          | 0.14583  |
| 41.5    | 0.09867                                         | 0.28843                                         | 0.13556  |
| 43      | 0.09041                                         | 0.28004                                         | 0.1431   |
| 44.5    | 0.08957                                         | 0.27088                                         | 0.1426   |
| 46      | 0.08769                                         | 0.26243                                         | 0.15715  |
| 47.5    | 0.09537                                         | 0.25538                                         | 0.13819  |
| 49      | 0.10024                                         | 0.24726                                         | 0.11695  |
| 50.5    | 0.08289                                         | 0.24056                                         | 0.14701  |
| 52      | 0.09144                                         | 0.23392                                         | 0.12071  |

**Table S4:** Fitting of the Cole-Cole plots with a generalized Debye model for temperature ranging under a zero dc field for **2**.

| $T$ (K) | $\chi_s$ (cm <sup>3</sup> . mol <sup>-1</sup> ) | $\chi_r$ (cm <sup>3</sup> . mol <sup>-1</sup> ) | $\alpha$ |
|---------|-------------------------------------------------|-------------------------------------------------|----------|
| 2       | 0.227                                           | 7.25                                            | 0.358    |
| 5       | 0.163                                           | 2.76                                            | 0.299    |
| 10      | 0.104                                           | 1.33                                            | 0.267    |
| 15      | 0.0749                                          | 0.878                                           | 0.255    |
| 20      | 0.0563                                          | 0.663                                           | 0.26     |
| 22      | 0.0534                                          | 0.604                                           | 0.262    |
| 24      | 0.0502                                          | 0.553                                           | 0.254    |
| 26      | 0.0451                                          | 0.511                                           | 0.253    |
| 28      | 0.044                                           | 0.475                                           | 0.246    |
| 30      | 0.0421                                          | 0.444                                           | 0.245    |
| 32      | 0.0382                                          | 0.418                                           | 0.246    |
| 34      | 0.0353                                          | 0.393                                           | 0.244    |
| 36      | 0.0354                                          | 0.371                                           | 0.231    |
| 37      | 0.0354                                          | 0.36                                            | 0.226    |
| 38.5    | 0.0286                                          | 0.346                                           | 0.228    |
| 40      | 0.0324                                          | 0.331                                           | 0.197    |
| 41.5    | 0.0573                                          | 0.292                                           | 0.202    |
| 43      | 0.0201                                          | 0.308                                           | 0.197    |
| 44.5    | 0.0273                                          | 0.296                                           | 0.15     |

**Table S5:** Fitting of the Cole-Cole plots with a generalized Debye model for temperature ranging under a zero dc field for **3**.

| $T$ (K) | $\chi_S$ (cm <sup>3</sup> ·mol <sup>-1</sup> ) | $\chi_T$ (cm <sup>3</sup> ·mol <sup>-1</sup> ) | $\alpha$ |
|---------|------------------------------------------------|------------------------------------------------|----------|
| 17.4989 | 0.24443                                        | 0.6515                                         | 0.35351  |
| 24.9995 | 0.19198                                        | 0.43075                                        | 0.22303  |
| 32.4996 | 0.16067                                        | 0.33196                                        | 0.1574   |
| 39.9998 | 0.1365                                         | 0.27365                                        | 0.14079  |
| 47.4994 | 0.11976                                        | 0.23681                                        | 0.1405   |
| 54.9984 | 0.10273                                        | 0.21279                                        | 0.23172  |
| 62.4979 | 0.0786                                         | 0.20291                                        | 0.37365  |
| 69.9979 | 0.06512                                        | 0.21497                                        | 0.44346  |
| 71.9973 | 0.07189                                        | 0.20754                                        | 0.36748  |
| 73.9969 | 0.07738                                        | 0.20033                                        | 0.26243  |
| 77.996  | 0.07481                                        | 0.19154                                        | 0.19093  |
| 79.9959 | 0.07501                                        | 0.18604                                        | 0.14347  |
| 81.9971 | 0.07098                                        | 0.18235                                        | 0.16096  |
| 83.9952 | 0.07129                                        | 0.17921                                        | 0.12728  |
| 85.9984 | 0.07317                                        | 0.17383                                        | 0.09705  |
| 87.9954 | 0.04023                                        | 0.1723                                         | 0.19401  |
| 89.9978 | 0.04112                                        | 0.16814                                        | 0.20857  |

**Table S6:** Fit parameters of the field dependence of the relaxation time at 30 K for **1** and **2**.

| <i>Compound</i> | <i>D (s<sup>-1</sup>K<sup>-1</sup>Oe<sup>-4</sup>)</i> | <i>B<sub>1</sub> (s<sup>-1</sup>)</i> | <i>B<sub>2</sub> (Oe<sup>-2</sup>)</i> | <i>K</i> |
|-----------------|--------------------------------------------------------|---------------------------------------|----------------------------------------|----------|
| <b>1</b> (30 K) | $1.01 \times 10^{-15}$                                 | 195.5                                 | $9.1 \times 10^{-6}$                   | 540.1    |
| <b>2</b> (30 K) | $1.14 \times 10^{-16}$                                 | 71.0                                  | $4.1 \times 10^{-5}$                   | 107.8    |
| <b>3</b> (40 K) | $2.12 \times 10^{-16}$                                 | 31.9                                  | $1.4 \times 10^{-5}$                   | 85.6     |

**Table S7.** Fitting of the Cole-Cole plots with a generalized Debye model under a 1000 Oe dc field for **1**.

| <i>T</i> (K) | $\chi_S$ (cm <sup>3</sup> . mol <sup>-1</sup> ) | $\chi_T$ (cm <sup>3</sup> . mol <sup>-1</sup> ) | $\alpha$ |
|--------------|-------------------------------------------------|-------------------------------------------------|----------|
| 10           | 0.38656                                         | 0.97054                                         | 0.10623  |
| 14           | 0.28882                                         | 0.71587                                         | 0.1315   |
| 18           | 0.22666                                         | 0.59052                                         | 0.19482  |
| 20           | 0.20499                                         | 0.54514                                         | 0.22013  |
| 22.5         | 0.18247                                         | 0.49619                                         | 0.24045  |
| 25           | 0.15922                                         | 0.45668                                         | 0.27452  |
| 27.5         | 0.14781                                         | 0.41935                                         | 0.27205  |
| 30           | 0.12893                                         | 0.38859                                         | 0.23994  |
| 32           | 0.11932                                         | 0.36675                                         | 0.27499  |
| 33.5         | 0.11621                                         | 0.35148                                         | 0.25828  |
| 35           | 0.11621                                         | 0.35148                                         | 0.25828  |
| 36.5         | 0.11141                                         | 0.32315                                         | 0.18386  |
| 38           | 0.11047                                         | 0.31157                                         | 0.14721  |
| 39.5         | 0.10587                                         | 0.30000                                         | 0.12147  |
| 41           | 0.09613                                         | 0.29019                                         | 0.14259  |
| 42.5         | 0.09657                                         | 0.2802                                          | 0.13415  |
| 44           | 0.09629                                         | 0.27214                                         | 0.13183  |
| 45.5         | 0.09326                                         | 0.2639                                          | 0.13643  |
| 47           | 0.09947                                         | 0.25646                                         | 0.12833  |
| 48.5         | 0.09141                                         | 0.24782                                         | 0.1413   |

**Table S8.** Fitting of the Cole-Cole plots with a generalized Debye model under a 1000 Oe dc field for **2.**

| $T$ (K) | $\chi_S$ (cm <sup>3</sup> . mol <sup>-1</sup> ) | $\chi_T$ (cm <sup>3</sup> . mol <sup>-1</sup> ) | $\alpha$ |
|---------|-------------------------------------------------|-------------------------------------------------|----------|
| 20      | 0.05629                                         | 0.70261                                         | 0.26076  |
| 22      | 0.05193                                         | 0.64603                                         | 0.27076  |
| 24      | 0.04775                                         | 0.59089                                         | 0.26426  |
| 26      | 0.04562                                         | 0.54063                                         | 0.25095  |
| 28      | 0.03827                                         | 0.50568                                         | 0.26368  |
| 30      | 0.03975                                         | 0.46898                                         | 0.24895  |
| 32      | 0.03442                                         | 0.43914                                         | 0.2463   |
| 34      | 0.039                                           | 0.41144                                         | 0.22582  |
| 36      | 0.033                                           | 0.38719                                         | 0.21998  |
| 37      | 0.03281                                         | 0.37703                                         | 0.22591  |
| 38.5    | 0.03134                                         | 0.36089                                         | 0.20852  |
| 40      | 0.02821                                         | 0.34619                                         | 0.20406  |
| 41.5    | 0.03342                                         | 0.33383                                         | 0.17699  |
| 34      | 0.01918                                         | 0.32159                                         | 0.19017  |
| 44.5    | 0.03516                                         | 0.30972                                         | 0.14721  |

**Table S9.** Fitting of the Cole-Cole plots with a generalized Debye model under a 1000 Oe dc field for **2.**

| $T$ (K)  | $\chi_S$ (cm <sup>3</sup> . mol <sup>-1</sup> ) | $\chi_T$ (cm <sup>3</sup> . mol <sup>-1</sup> ) | $\alpha$ |
|----------|-------------------------------------------------|-------------------------------------------------|----------|
| 27.14288 | 0.17384                                         | 0.38425                                         | 0.15036  |
| 41.42824 | 0.12025                                         | 0.25674                                         | 0.14036  |
| 48.57047 | 0.10276                                         | 0.22358                                         | 0.17453  |
| 55.71231 | 0.09339                                         | 0.19924                                         | 0.19334  |
| 62.85474 | 0.07774                                         | 0.18819                                         | 0.29281  |
| 69.99895 | 0.05789                                         | 0.20178                                         | 0.42599  |
| 71.99842 | 0.05823                                         | 0.19564                                         | 0.34738  |
| 73.99617 | 0.06713                                         | 0.18966                                         | 0.26902  |
| 75.99703 | 0.06526                                         | 0.18317                                         | 0.20831  |
| 77.99517 | 0.06226                                         | 0.17846                                         | 0.18221  |
| 79.99618 | 0.05527                                         | 0.1752                                          | 0.19563  |

|          |             |         |         |
|----------|-------------|---------|---------|
| 81.99704 | 0.05867     | 0.17035 | 0.14327 |
| 83.99694 | 0.05059     | 0.16723 | 0.16064 |
| 85.99476 | 0.04654     | 0.16383 | 0.13844 |
| 87.99646 | 0.01646     | 0.15848 | 0.26486 |
| 89.99459 | 1.41041E-14 | 0.15866 | 0.25522 |
| 91.99635 | 0.0157      | 0.15219 | 0.13698 |

**Table S10.** Fit parameters of the temperature dependence of the relaxation time for **1-3**.

| Compound           | $\Delta(\text{cm}^{-1})$ | $\tau_0(\text{s})$          | $m$  | $C(\text{s}^{-1}\cdot\text{K}^{-m})$ |
|--------------------|--------------------------|-----------------------------|------|--------------------------------------|
| <b>1</b> (1000 Oe) | $184 \pm 10$             | $(8 \pm 2) \times 10^{-7}$  | 2*   | $0.32 \pm 0.07$                      |
| <b>2</b> (1000 Oe) | $470 \pm 13$             | $(4 \pm 2) \times 10^{-11}$ | 2.1* | $0.06 \pm 0.02$                      |
| <b>3</b> (1000 Oe) | $1534 \pm 121$           | $(3 \pm 5) \times 10^{-15}$ | 2.1* | $0.04 \pm 0.01$                      |

\* fixed parameter

**Table S11.** Estimation of the relaxation time and temperature switch.

|                                                                                         | $\tau_{\text{switch}}(\text{s})$ | $T_{\text{switch}}(\text{K})$ |
|-----------------------------------------------------------------------------------------|----------------------------------|-------------------------------|
| <b>1</b>                                                                                | $6.40 \times 10^{-4}$            | 36.6                          |
| <b>2</b>                                                                                | $1.91 \times 10^{-3}$            | 37.2                          |
| <b>3</b>                                                                                | $1.12 \times 10^{-3}$            | 80.3                          |
| <b>[Dy(OCPh<sub>3</sub>)<sub>2</sub>(THF)<sub>4</sub>][BPh<sub>4</sub>]<sup>3</sup></b> | $1.04 \times 10^{-3}$            | 85.1                          |



**Table S12.** Crystal-field splitting of the  ${}^4F_{9/2}$  obtained by luminescence and their relative Boltzmann population at 77 K.

| ${}^4F_{9/2}$ doublets | Energy ( $cm^{-1}$ ) | Relative population at 77 K |
|------------------------|----------------------|-----------------------------|
| 1                      | 0                    | 0.97586988                  |
| 2                      | 198                  | 0.02412942                  |
| 3                      | 758                  | 6.8855E-07                  |
| 4                      | 1078                 | -                           |
| 5                      | 1175                 | -                           |

## References

- 1 K. Randall McClain, C. A. Gould, K. Chakarawet, S. J. Teat, T. J. Groshens, J. R. Long and B. G. Harvey, *Chem. Sci.*, 2018, **9**, 8492-8503.
- 2 D. Reta and N. F. Chilton, *Phys. Chem. Chem. Phys.*, 2019, **21**, 23567-23575.
- 3 J. Long, A. O. Tolpygin, E. Mamontova, K. A. Lyssenko, D. Liu, M. D. Albaqami, L. F. Chibotaru, Y. Guari, J. Larionova and A. A. Trifonov, *Inorg. Chem. Front.*, 2021, **8**, 1166-1174.
